# Supplementary material
Source: PubMed Central journal article supplement (PMC5878700)

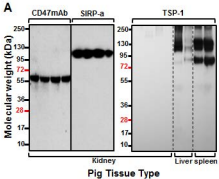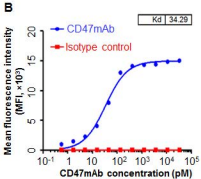

Baseline

0s

1s

15s

30s

60s

Control

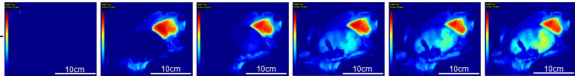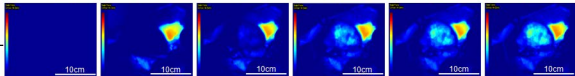

CD47mAb

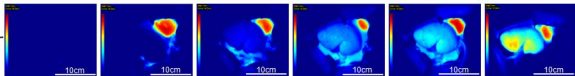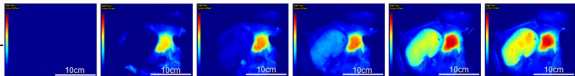

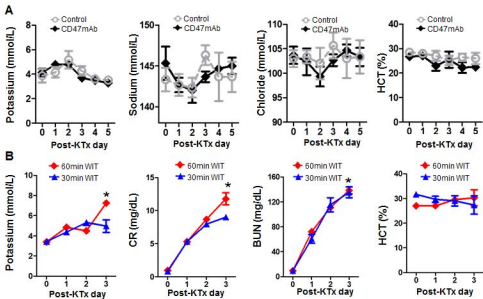

Supplement: NIHMS916823-supplement-Supp_FigS1-3.pdf [file NIHMS916823-supplement-Supp_FigS1-3.pdf]
